# Supplementary material for: An Efficiency Improvement Driver for Master Oscillator Power Amplifier Pulsed Laser Systems
Source: MDPI journal article supplement (doi:10.3390/pr10061197), 2022-06-16
Supplement: s1 [file s1]

## Supplementary Material

# An Efficiency Improvement Driver for Master Oscillator Power Amplifier Pulsed Laser Systems

Fu-Zen Chen <sup>1,\*</sup>, Yu-Cheng Song<sup>2</sup> and Fu-Shun Ho<sup>2</sup>

<sup>1</sup> National Kaohsiung University of Science and Technology;

<sup>2</sup> Industrial Technology Research Institute;

\* Correspondence: chenfuzen@nkust.edu.tw;

**Table S1.** Efficiency of the Power LD driver.

| Frequency | Input Current | Input Voltage | Drive Voltage | Drive Current | Input Power | Drive Power | Efficiency |
|-----------|---------------|---------------|---------------|---------------|-------------|-------------|------------|
| (kHz)     | (A)           | (V)           | (V)           | (A)           | (W)         | (W)         | (%)        |
| 20        | 0.39          | 14.986        | 8.69          | 0.485         | 5.84454     | 4.21465     | 72.1126    |
| 20        | 0.73          | 14.958        | 9.12          | 1.107         | 10.91934    | 10.09584    | 92.45834   |
| 20        | 1.38          | 14.915        | 9.54          | 2.05          | 20.5827     | 19.557      | 95.01669   |
| 20        | 2.1           | 14.867        | 9.9           | 3.04          | 31.2207     | 30.096      | 96.39758   |
| 20        | 2.89          | 14.816        | 10.26         | 4.026         | 42.81824    | 41.30676    | 96.47001   |
| 20        | 3.73          | 14.762        | 10.59         | 5.024         | 55.06226    | 53.20416    | 96.62546   |
| 20        | 4.61          | 14.705        | 10.91         | 5.996         | 67.79005    | 65.41636    | 96.49847   |
| 20        | 5.63          | 14.637        | 11.28         | 7.043         | 82.40631    | 79.44504    | 96.4065    |
| 20        | 6.69          | 14.566        | 11.62         | 8.105         | 97.44654    | 94.1801     | 96.64797   |
| 20        | 7.38          | 14.52         | 11.74         | 8.788         | 107.1576    | 103.1711    | 96.2798    |
| 40        | 0.29          | 14.988        | 8.57          | 0.407         | 4.34652     | 3.48799     | 80.24788   |
| 40        | 0.7           | 14.961        | 9.03          | 1.059         | 10.4727     | 9.56277     | 91.31141   |
| 40        | 1.37          | 14.917        | 9.48          | 2.049         | 20.43629    | 19.42452    | 95.04915   |
| 40        | 2.1           | 14.869        | 9.86          | 3.036         | 31.2249     | 29.93496    | 95.86887   |
| 40        | 2.89          | 14.818        | 10.21         | 4.038         | 42.82402    | 41.22798    | 96.27303   |
| 40        | 3.71          | 14.763        | 10.53         | 5.019         | 54.77073    | 52.85007    | 96.49327   |
| 40        | 4.6           | 14.704        | 10.85         | 6.008         | 67.6384     | 65.1868     | 96.37543   |
| 40        | 5.58          | 14.639        | 11.19         | 7.021         | 81.68562    | 78.56499    | 96.17971   |
| 40        | 6.69          | 14.559        | 11.59         | 8.07          | 97.39971    | 93.5313     | 96.02831   |
| 40        | 7.35          | 14.516        | 11.8          | 8.676         | 106.6926    | 102.3768    | 95.95492   |
| 100       | 0.31          | 14.983        | 8.67          | 0.415         | 4.64473     | 3.59805     | 77.46521   |
| 100       | 0.7           | 14.958        | 9.09          | 1.038         | 10.4706     | 9.43542     | 90.11346   |
| 100       | 1.4           | 14.912        | 9.55          | 2.064         | 20.8768     | 19.7112     | 94.41677   |
| 100       | 2.12          | 14.866        | 9.91          | 3.026         | 31.51592    | 29.98766    | 95.15083   |
| 100       | 2.91          | 14.812        | 10.25         | 4.021         | 43.10292    | 41.21525    | 95.62055   |
| 100       | 3.81          | 14.754        | 10.6          | 5.083         | 56.21274    | 53.8798     | 95.8498    |

|     |      |        |       |       |          |          |          |
|-----|------|--------|-------|-------|----------|----------|----------|
| 100 | 4.67 | 14.698 | 10.9  | 6.032 | 68.63966 | 65.7488  | 95.78835 |
| 100 | 5.64 | 14.635 | 11.24 | 7.023 | 82.5414  | 78.93852 | 95.63506 |
| 100 | 6.72 | 14.563 | 11.6  | 8.057 | 97.86336 | 93.4612  | 95.50173 |
| 100 | 7.23 | 14.529 | 11.74 | 8.538 | 105.0447 | 100.2361 | 95.42238 |
| 200 | 0.38 | 14.982 | 8.71  | 0.504 | 5.69316  | 4.38984  | 77.10727 |
| 200 | 0.7  | 14.96  | 9.04  | 1.007 | 10.472   | 9.10328  | 86.92972 |
| 200 | 1.39 | 14.915 | 9.5   | 2.021 | 20.73185 | 19.1995  | 92.60872 |
| 200 | 2.12 | 14.867 | 9.87  | 3.006 | 31.51804 | 29.66922 | 94.13409 |
| 200 | 2.92 | 14.815 | 10.22 | 4.012 | 43.2598  | 41.00264 | 94.78232 |
| 200 | 3.78 | 14.759 | 10.55 | 5.016 | 55.78902 | 52.9188  | 94.85522 |
| 200 | 4.67 | 14.699 | 10.87 | 6     | 68.64433 | 65.22    | 95.01149 |
| 200 | 5.68 | 14.633 | 11.22 | 7.021 | 83.11544 | 78.77562 | 94.77856 |
| 200 | 6.73 | 14.563 | 11.53 | 8.068 | 98.00899 | 93.02404 | 94.91378 |
| 200 | 6.87 | 14.552 | 11.55 | 8.21  | 99.97224 | 94.8255  | 94.85183 |
